# Supplementary material for: Dexmedetomidine reduces ventilator-induced lung injury via ERK1/2 pathway activation
Source: PubMed Central journal article supplement — Mol Med Rep. 2020 Oct 19;22(6):5378–84. doi: 10.3892/mmr.2020.11612 (PMC7647005; doi:10.3892/mmr.2020.11612), 2020-10-19
Supplement: Supplementary_Data.pdf [file Supplementary_Data.pdf]

Table SI. MAP at each time-point.

| Group             | MAP, mmHg  |            |            |            |            |            |            |            |            |            |
|-------------------|------------|------------|------------|------------|------------|------------|------------|------------|------------|------------|
|                   | T0         | T1         | T2         | T3         | T4         | T5         | T6         | T7         | T8         | T9         |
| Sham              | 77.36±6.13 | 71.64±4.45 | 75.72±4.34 | 75.32±4.49 | 76.68±4.55 | 75.48±3.96 | 75.32±5.44 | 76.44±5.16 | 76.08±4.07 | 73.88±5.34 |
| VILI              | 75.36±5.23 | 73.64±3.24 | 72.52±3.24 | 77.32±3.24 | 78.34±3.24 | 78.57±3.38 | 74.56±4.12 | 75.26±4.87 | 73.67±3.75 | 72.45±3.65 |
| VILI+L-Dex        | 73.54±4.35 | 70.64±2.16 | 73.25±4.32 | 73.56±4.35 | 73.45±3.78 | 72.46±3.78 | 70.21±3.05 | 71.37±3.56 | 75.24±3.97 | 71.23±5.13 |
| VILI+H-Dex        | 70.36±3.24 | 76.25±4.23 | 75.67±2.56 | 74.24±4.21 | 75.28±2.87 | 73.58±2.85 | 72.63±3.97 | 74.98±4.47 | 74.56±4.59 | 70.34±4.37 |
| VILI+L-Dex<br>+PD | 71.43±4.53 | 72.37±5.13 | 70.67±1.67 | 72.78±3.97 | 71.24±3.89 | 70.72±4.21 | 73.29±4.25 | 72.76±3.98 | 74.39±4.78 | 72.73±3.85 |
| VILI+H-Dex<br>+PD | 72.67±3.78 | 74.64±3.47 | 71.34±2.41 | 75.68±2.96 | 74.75±4.35 | 71.36±2.98 | 72.57±4.98 | 73.68±4.57 | 75.52±5.34 | 71.51±5.16 |
| PD                | 70.12±4.13 | 72.54±4.26 | 73.54±2.37 | 74.25±4.56 | 70.34±3.26 | 74.35±4.27 | 72.46±3.49 | 74.35±4.95 | 72.65±5.25 | 70.95±4.34 |

N=24. Dex, dexmedetomidine; H-Dex, high dose Dex at 10  $\mu\text{g}/\text{kg}$ ; L-Dex, low dose Dex at 1  $\mu\text{g}/\text{kg}$ ; MAP, mean arterial pressure; PD, PD98059; T0, 10 min before Dex application; T1, 5 min before Dex application; T2, 5 min after drug application; T3, 10 min after drug application; T4, 30 min after drug application; T5, 60 min after drug application; T6, 90 min after drug application; T7, 120 min after drug application; T8, 180 min after drug application; T9, 240 min after drug application; VILI, ventilator-induced lung injury group.

Table SII. HR of each group at each time-point.

| Group             | HR, bpm     |            |            |            |            |            |            |            |            |            |
|-------------------|-------------|------------|------------|------------|------------|------------|------------|------------|------------|------------|
|                   | T0          | T1         | T2         | T3         | T4         | T5         | T6         | T7         | T8         | T9         |
| Sham              | 100.34±4.67 | 95.45±4.45 | 94.56±5.47 | 89.45±5.36 | 87.69±4.87 | 85.84±3.96 | 82.45±5.54 | 84.35±4.36 | 80.67±4.74 | 82.36±4.59 |
| VILI              | 106.36±5.43 | 98.45±5.34 | 95.35±5.35 | 90.56±3.45 | 91.36±4.38 | 87.46±4.21 | 89.68±5.13 | 87.78±5.74 | 81.43±5.34 | 84.56±4.89 |
| VILI+L-Dex        | 103.36±4.12 | 97.56±5.15 | 90.43±4.34 | 89.76±4.62 | 86.45±5.76 | 85.34±4.65 | 84.73±4.29 | 85.65±5.97 | 84.83±5.41 | 83.21±4.29 |
| VILI+H-Dex        | 105.45±3.65 | 98.54±5.64 | 92.45±5.46 | 88.54±4.85 | 84.56±4.85 | 83.64±4.53 | 82.56±3.26 | 83.26±4.78 | 83.75±3.59 | 83.24±3.78 |
| VILI+L-Dex<br>+PD | 104.73±4.46 | 96.47±4.67 | 94.68±4.97 | 90.43±3.96 | 85.54±5.10 | 84.64±3.86 | 83.45±3.83 | 82.53±3.57 | 85.45±4.36 | 84.37±3.67 |
| VILI+H-Dex<br>+PD | 101.24±3.94 | 95.46±4.79 | 90.64±5.37 | 88.54±4.86 | 83.65±4.75 | 83.75±3.51 | 84.24±4.17 | 83.65±4.75 | 83.54±3.79 | 82.57±4.03 |
| PD                | 100.56±5.45 | 96.48±5.06 | 91.46±4.30 | 90.54±3.98 | 84.37±4.59 | 82.56±3.68 | 83.56±4.69 | 82.35±5.01 | 82.35±3.67 | 83.67±4.38 |

N=24. Bpm, beats per minute; Dex, dexmedetomidine; H-Dex, high dose Dex at 10  $\mu\text{g}/\text{kg}$ ; HR, heart rate; L-Dex, low dose Dex at 1  $\mu\text{g}/\text{kg}$ ; PD, PD98059; T0, 10 min before Dex application; T1, 5 min before Dex application; T2, 5 min after drug application; T3, 10 min after drug application; T4, 30 min after drug application; T5, 60 min after drug application; T6, 90 min after drug application; T7, 120 min after drug application; T8, 180 min after drug application; T9, 240 min after drug application; VILI, ventilator-induced lung injury.
